# Supplementary material for: PwHAP5, a CCAAT-binding transcription factor, interacts with PwFKBP12 and plays a role in pollen tube growth orientation in Picea wilsonii
Source: PubMed Central journal article supplement — J Exp Bot. 2011 Jul 22;62(14):4805–17. doi: 10.1093/jxb/err120 (PMC3192995; doi:10.1093/jxb/err120), 2011-07-22
Supplement: supp_err120_00059659-file001.pdf [file supp_err120_00059659-file001.pdf]

**PwHAP5, a CCAAT-binding transcription factor, interacts with PwFKBP12 and plays a role in pollen tube growth orientation in *Picea wilsonii***

*Yanli Yu, Yanze Li, Guixue Huang, Zhaodong Meng, Dun Zhang, Jing Wei, Kang Yan, Chengchao Zheng, and Lingyun Zhang*

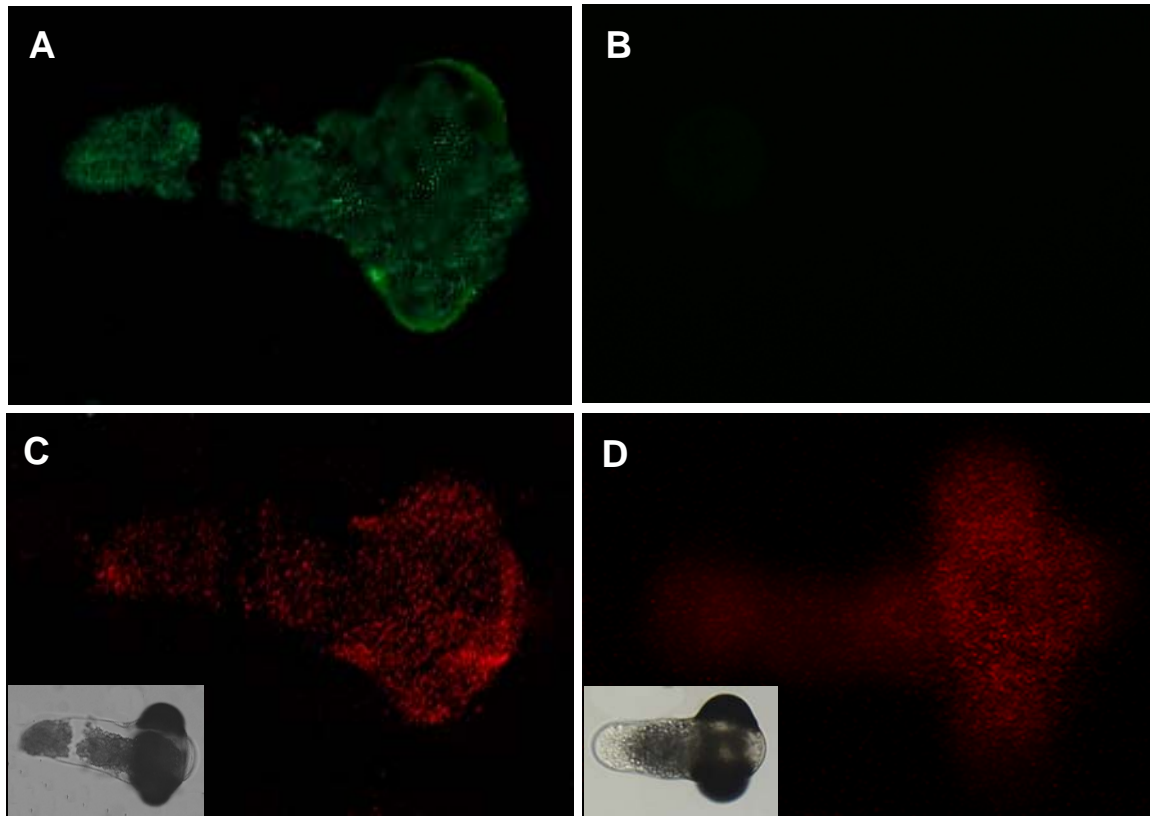

**Fig. S1** Transient suppression of GFP gene expression in *P. wilsonii* pollens by **pFGCLat52**-based vector. (A, B) GFP fluorescence. (C, D) CHERRY fluorescence. (A) (C) Control experiment. Pollens were co-bombarded with Lat52-GFP, Lat52-CHERRY, and the empty pFGCLat52 vector. (B, D) Pollens were co-bombarded with Lat52-GFP, Lat52-CHERRY, and *GFP* RNAi vector using the pFGCLat52 vector. A transient expression assay was performed by particle bombardment of pollens of *P. wilsonii* by the use of the PDS-1000/He system (Bio-Rad Laboratories). For the co-bombardment assay, 2  $\mu$ g each of Lat52-GFP and Lat52-CHERRY plasmids and 6  $\mu$ g of the *GFP* RNAi vector or empty pFGCLat52 vector were introduced into *P. wilsonii* pollens. The fluorescence of the GFP and CHERRY proteins was observed with a confocal microscope (LSM 510 META, Zeiss) following incubation for 12 h at 25°C.
